# Supplementary material for: Guidance for Evidence-Informed Policies about Health Systems: Assessing How Much Confidence to Place in the Research Evidence
Source: PubMed Central journal article supplement (PMC3308931; doi:10.1371/journal.pmed.1001187), 2012-03-20
Supplement: pmed.1001187.s010.pdf [file pmed.1001187.s010.pdf]

**Table S5: Definitions of the quality of evidence categories within GRADE**

|                 |                                                                                                                                                                                        |      |
|-----------------|----------------------------------------------------------------------------------------------------------------------------------------------------------------------------------------|------|
| <b>High</b>     | We are very confident that the true effect lies close to that of the estimate of the effect                                                                                            | ⊕⊕⊕⊕ |
| <b>Moderate</b> | We are moderately confident in the effect estimate: The true effect is likely to be close to the estimate of the effect, but there is a possibility that it is substantially different | ⊕⊕⊕○ |
| <b>Low</b>      | Our confidence in the effect estimate is limited: The true effect may be substantially different from the estimate of the effect                                                       | ⊕⊕○○ |
| <b>Very low</b> | We have very little confidence in the effect estimate: The true effect is likely to be substantially different from the estimate of effect                                             | ⊕○○○ |

Source: [1]

### References

1. Balshem H, Helfand M, Schunemann HJ, Oxman AD, Kunz R, Brozek J, Vist GE, Falck-Ytter Y, Meerpohl J, Norris S, Guyatt GH (2011) GRADE guidelines: 3. Rating the quality of evidence. J Clin Epidemiol 64: 401-406.
