# Supplementary material for: Guidance for Evidence-Informed Policies about Health Systems: Assessing How Much Confidence to Place in the Research Evidence
Source: PLoS Med. 2012 Mar 20;9(3):e1001187. doi: 10.1371/journal.pmed.1001187 (PMC3308931; doi:10.1371/journal.pmed.1001187)
Supplement: Table S4 — Assessing how much confidence can be placed in the findings of systematic reviews of qualitative studies (PDF) [file pmed.1001187.s009.pdf]

**Table S4: Assessing how much confidence can be placed in the findings of systematic reviews of qualitative studies<sup>a</sup>**

| <b>Key questions</b>                                                                              |
|---------------------------------------------------------------------------------------------------|
| 1. Did the review address an appropriate policy or management question?                           |
| 2. Was a clear and appropriate explanation provided for the search approach used?                 |
| 3. Were the criteria used to select studies appropriate?                                          |
| 4. Was the approach used to appraise the reliability of the included studies appropriate?         |
| 5. Was an appropriate approach used to analyse the findings of the included studies?              |
| 6. Does the review provide a coherent explanation of the issue of phenomenon under consideration? |

Source: adapted from [1]

<sup>a</sup> A large number of tools are available to assess the quality of primary qualitative research (for example, [2,3]), and the principles underlying these tools may also be useful when assessing systematic reviews of qualitative studies.

## References

1. Lewin S, Oxman AD, Lavis JN, Fretheim A (2009) SUPPORT Tools for evidence-informed health Policymaking (STP) 8: Deciding how much confidence to place in a systematic review. *Health Res Policy Syst* 7 Suppl 1: S8.
2. Spencer, L., Ritchie, J., Lewis, J., and Dillon, L. (2003) *Quality in Qualitative Evaluation: A framework for assessing research evidence*. England: Government Chief Social Researcher's Office.
3. Critical Appraisal Skills Programme (2006) 10 questions to help you make sense of qualitative research. England: Public Health Resource Unit.
